# Supplementary material
Source: publisher figshare collection journal article supplement (https://sage.figshare.com/ndownloader/files/15964379)
Supplement: Supplementary file 1 [file 15964379]

## Online Appendix

**Figure A1.** Forest plot of rates of return to sport at any level.

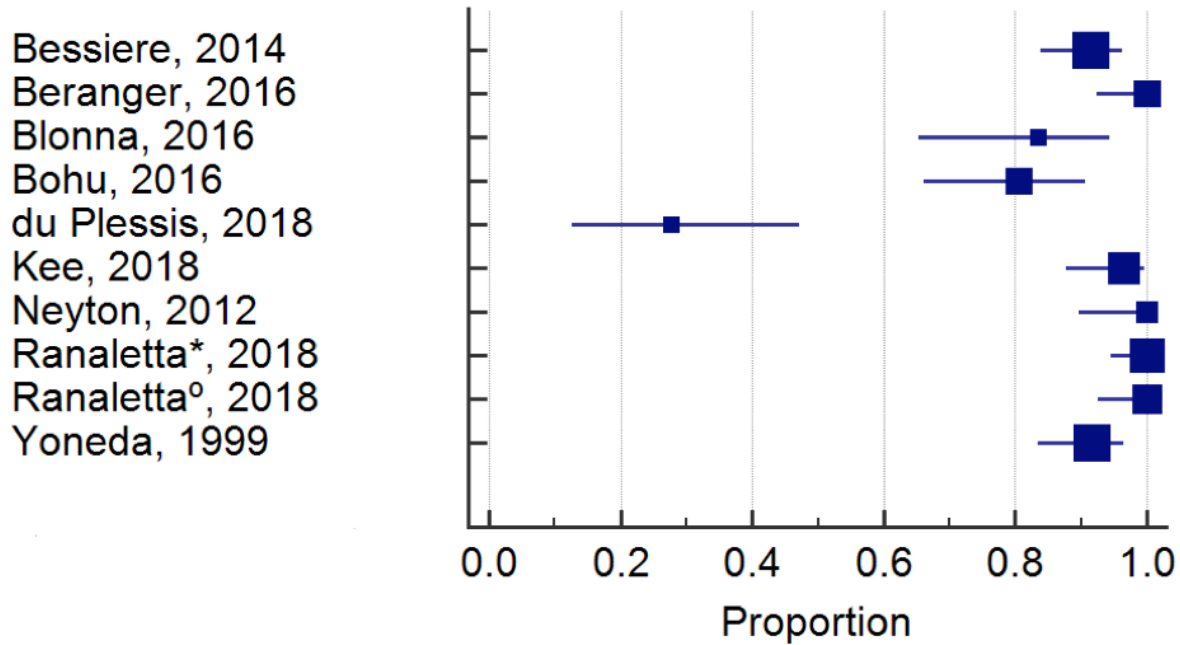

**Figure A2.** Forest plot of rates of return to sport at preinjury level.

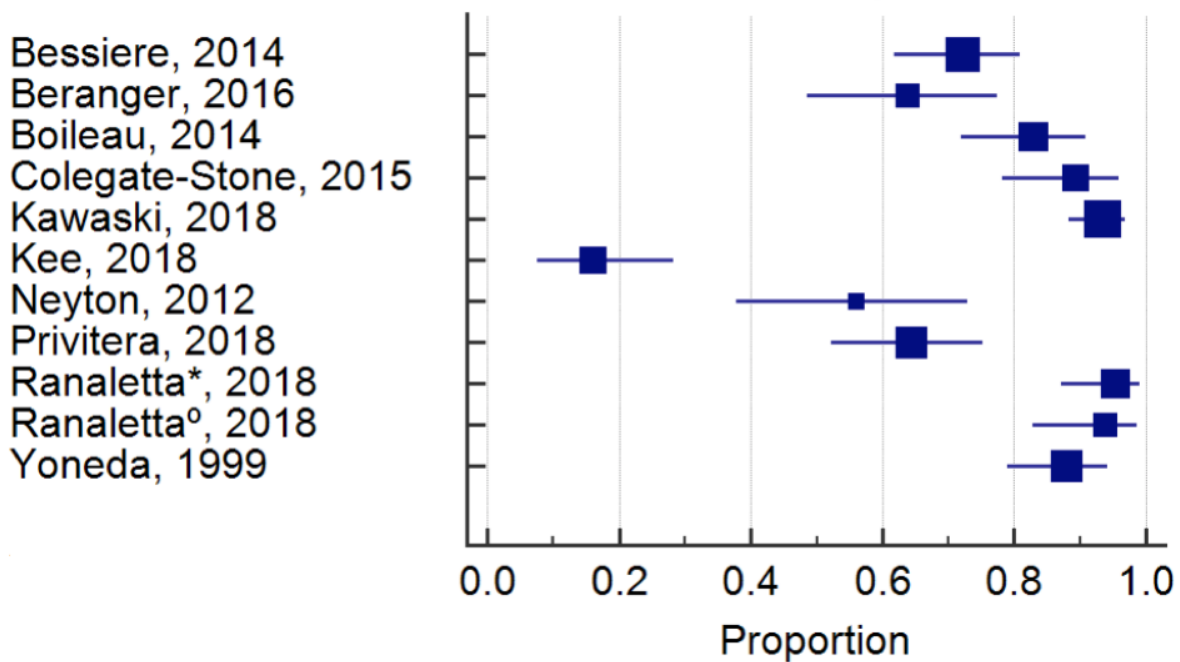

**Table A1.** Summary of Included Studies and Patient Demographics

| First Author   | Year | LOE | N  | Follow-Up   | Procedure                                                  | Inclusion Criteria                                                                                                                                        |
|----------------|------|-----|----|-------------|------------------------------------------------------------|-----------------------------------------------------------------------------------------------------------------------------------------------------------|
| Bessiere       | 2014 | III | 93 | 72 (50-118) | Open Latarjet                                              | Open Latarjet procedure for recurrent traumatic anterior instability, minimum 4 years follow-up                                                           |
| Beranger       | 2016 | IV  | 47 | 47 ± 10     | Open Bristow-Latarjet                                      | Minimally invasive Bristow-Latarjet procedure for chronic post-traumatic anterior instability, athlete, age <50 years, ISIS >3, minimum 2 years follow-up |
| Blonna         | 2016 | III | 30 | 64 (24-108) | Open Bristow-Latarjet                                      | Posttraumatic recurrent anterior dislocation (2+ episodes), minimum 2 years follow-up, age >18 years                                                      |
| Bohu           | 2016 | III | 46 | 18 ± 5      | Open Latarjet                                              | Primary minimally invasive Latarjet procedure for unidirectional anterior instability                                                                     |
| Boileau        | 2014 | IV  | 70 | 35          | Arthroscopic Bristow-Latarjet combined with Bankart repair | ISIS > 3, presence of severe glenoid bone defect (>20% of surface measured on CT)                                                                         |
| Colegate-Stone | 2015 | III | 56 | 12          | Modified congruent arc Latarjet                            | Modified congruent arc Latarjet procedure, athlete with recurrent anterior instability                                                                    |

|            |      |    |     |              |                                                |                                                                                                                                                                                                                                                |
|------------|------|----|-----|--------------|------------------------------------------------|------------------------------------------------------------------------------------------------------------------------------------------------------------------------------------------------------------------------------------------------|
| du Plessis | 2018 | IV | 29  | ≥12          | Modified Latarjet (Walch-Boileau)              | Female with recurrent anterior instability who played a contact sport, had anterior glenoid bone loss >10% or Hills-Sachs lesion of >20%, or had failed soft tissue stabilization procedure                                                    |
| Kawaski    | 2018 | IV | 152 | 51 (47-56)   | Open Bristow                                   | Competitive rugby players who desired to return to play, injury involving acute or recurrent dislocation/subluxation, minimum 2 years follow-up                                                                                                |
| Kee        | 2018 | IV | 56  | 67 (24-113)  | Open Latarjet                                  | Latarjet procedure for recurrent anterior instability, athlete, minimum 2 years follow-up                                                                                                                                                      |
| Neyton     | 2012 | IV | 34  | 144 (68-237) | Latarjet-Patte                                 | Rugby players with recurrent anterior instability treated with Latarjet-Patte procedure                                                                                                                                                        |
| Privitera  | 2018 | IV | 73  | 52 (24-120)  | Open Latarjet                                  | Open Latarjet procedure, signs of anterior instability on examination and glenoid osseous defect on CT or prior failed anterior shoulder stabilization procedure, participation in contact/collision sport                                     |
| Ranaletta* | 2018 | IV | 65  | 44 (24-108)  | Modified Latarjet without capsulolabral repair | Modified Latarjet procedure without capsulolabral reconstruction, recurrent shoulder instability after at least one previous surgery, clinical findings of recurrence of anterior shoulder instability and glenoid lesion > 20% on CT, athlete |

|                        |      |    |    |             |                                                            |                                                                                                                                                                                                                                 |
|------------------------|------|----|----|-------------|------------------------------------------------------------|---------------------------------------------------------------------------------------------------------------------------------------------------------------------------------------------------------------------------------|
| Ranaletta <sup>9</sup> | 2018 | IV | 49 | 48 (24-108) | Modified Latarjet without capsulolabral repair             | Modified congruent arc Latarjet procedure without capsulolabral repair, recurrent anterior instability, competitive rugby player (practice >2 times per week and competitions during weekends), glenoid bone defect > 20% on CT |
| Yoneda                 | 1999 | IV | 83 | 70 (24-144) | Arthroscopic Bankart repair augmented by coracoid transfer | Bankart procedure augmented by coracoid transfer, traumatic anterior dislocation or subluxation, contact athlete, minimum 2 years follow-up                                                                                     |

---

Follow-up is reported in months (range). LOE (Level of evidence), ISIS (Instability Severity Index Score).

**Table A2.** Patient Reported Outcomes

|      | First Author | Year | N   | Score               |
|------|--------------|------|-----|---------------------|
| Rowe | Bessiere     | 2014 | 93  | 78 (10-100)         |
|      | Boileau      | 2014 | 70  | 89.7 (65-100)       |
|      | Kawaskai     | 2018 | 152 | 87.7 (85.5-89.9)    |
|      | Kee          | 2018 | 56  | 88.6                |
|      | Neyton       | 2012 | 34  | 93 (60-100)         |
|      | Ranalletta   | 2018 | 49  | 94                  |
|      | Ranalletta   | 2018 | 65  | 90                  |
|      | Yoneda       | 1999 | 83  | 91 (30-100)         |
| WOSI | Beranger     | 2016 | 47  | 223.6               |
|      | Bohu         | 2016 | 46  | 343.4               |
|      | du Plessis   | 2018 | 29  | 433 (63-1927)       |
|      | Kawaskai     | 2018 | 152 | 534.3 (473.4-595.3) |
| SSV  | Bessiere     | 2014 | 93  | 90 (30-100)         |
|      | Blonna       | 2016 | 30  | 75                  |
|      | du Plessis   | 2018 | 29  | 87 (5-100)          |
|      | Neyton       | 2012 | 34  | 90 (60-100)         |

WOSI (Western Ontario Shoulder Instability Index), SSV (Subjective Shoulder Value).
